# Supplementary material for: Down regulation of the expression of mitochondrial phosphopantetheinyl-proteins in pantothenate kinase-associated neurodegeneration: pathophysiological consequences and therapeutic perspectives
Source: PubMed Central journal article supplement (PMC8101147; doi:10.1186/s13023-021-01823-3), 2021-05-05
Supplement: 13023_2021_1823_MOESM1_ESM.pdf [file 13023_2021_1823_MOESM1_ESM.pdf]

**a**

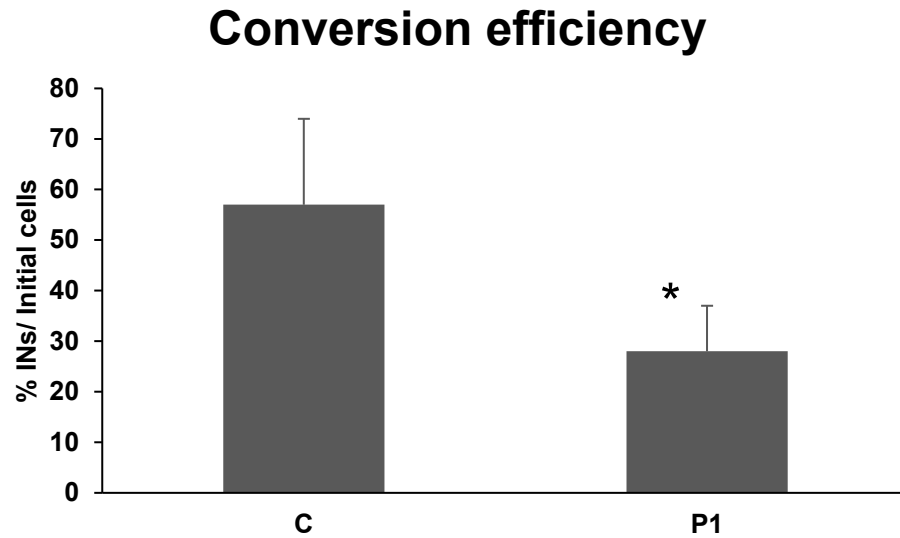

**b**

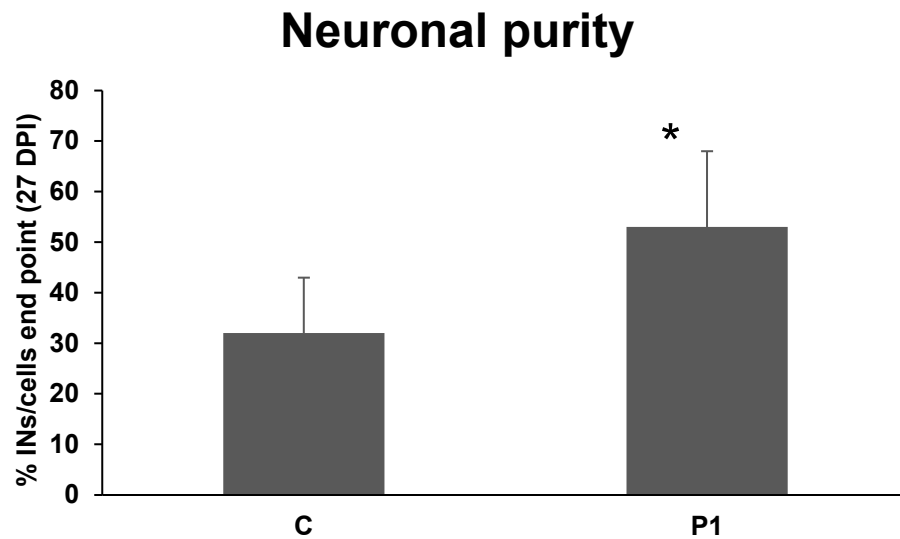

**Supplementary Fig. S1.** Tau/MAP2 immunostaining was used to calculate the conversion efficiency and the neuronal purity, and the results are plotted in panels **a** and **b**. The data are shown in the plots as the mean $\pm$ SD of three independent experiments (at least 50 neurons for each condition and experiment were examined), \* $p < 0.05$  between control and PKAN P1 fibroblasts.
